# Supplementary material
Source: PubMed Central journal article supplement (PMC9614138)
Supplement: ejhpharm-2020-002534supp001.pdf [file ejhpharm-2020-002534supp001.pdf]

| Resorcinol concentration | Accuracy            | Precision |           |
|--------------------------|---------------------|-----------|-----------|
|                          | Recovery percentage | %RSD      |           |
|                          |                     | Intra-day | Inter día |
| 75µg/mL                  | 99,8 ± 0,16         | 0,222     | 0,150     |
| 150µg/mL                 | 99,95 ± 0,04        | 0,028     | 0,185     |
| 200µg/mL                 | 99,77 ± 0,12        | 0,064     | 0,206     |

Supplementary table 2: Accuracy (n=15) and precision (n=15) at low, medium and high-level concentration.
