# Supplementary material
Source: PubMed Central journal article supplement (PMC9614138)
Supplement: ejhpharm-2020-002534supp002.pdf [file ejhpharm-2020-002534supp002.pdf]

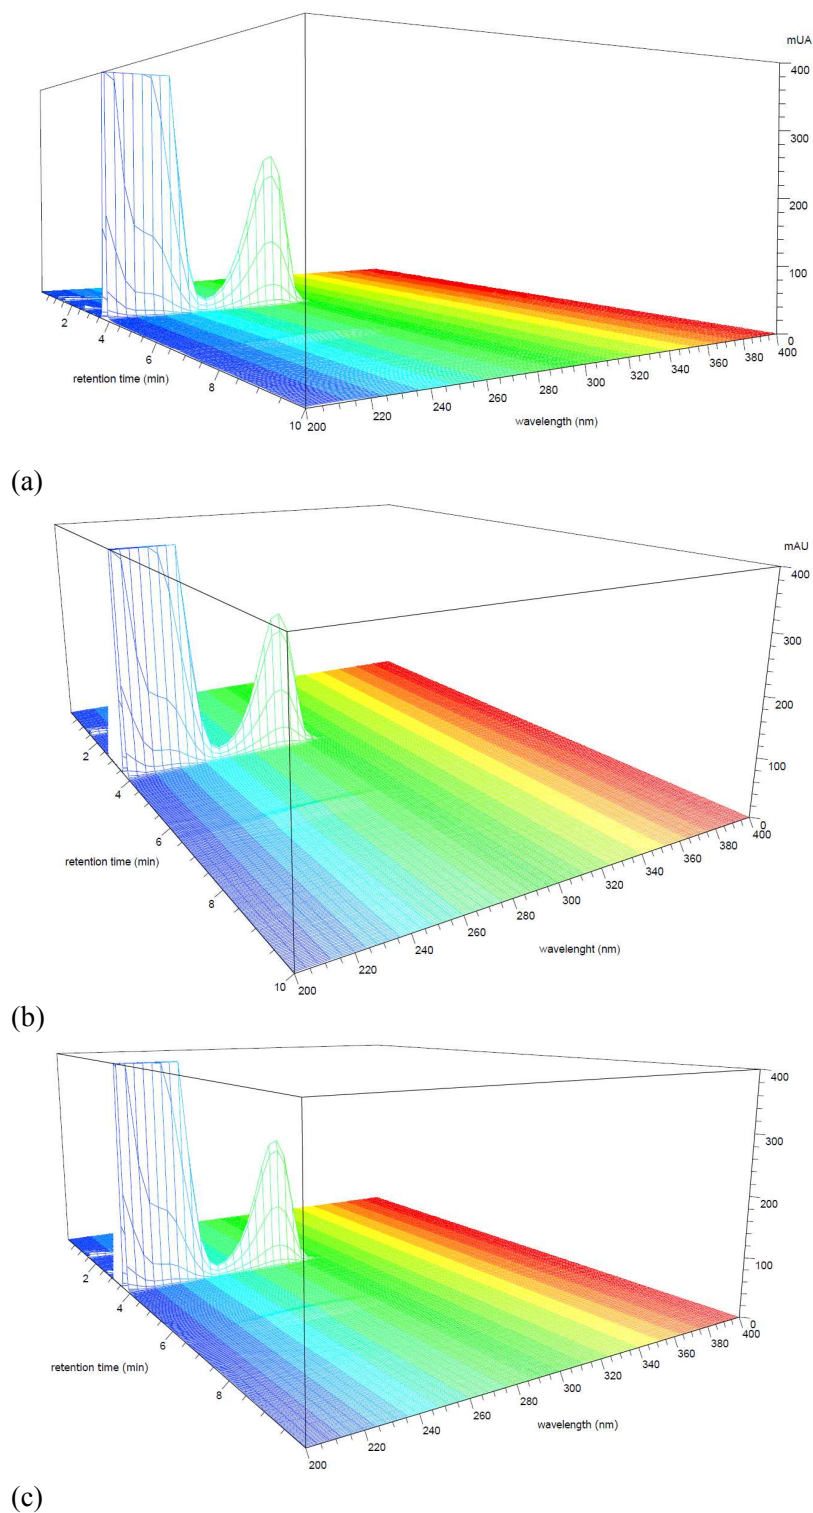

Supplementary Figure 1. 3D UV spectral analysis of resorcinol at day 365. 200-400 nm range. (a) Aluminum tubes, (b) Plastic containers, (c) Ambar plastic containers.
