# Supplementary material
Source: PubMed Central journal article supplement (PMC9614138)
Supplement: ejhpharm-2020-002534supp003.pdf [file ejhpharm-2020-002534supp003.pdf]

|                    |                                                                                                                                |
|--------------------|--------------------------------------------------------------------------------------------------------------------------------|
| Chemical Structure | 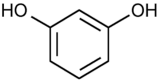<br><chem>Oc1cccc(O)c1</chem><br>$C_6H_6O_2$ |
| Molecular mass     | 110.11 g/mol                                                                                                                   |
| Water solubility   | 1 g/ml                                                                                                                         |
| pH                 | 4,4 (100 g/l, H <sub>2</sub> O, 20 °C)                                                                                         |
| Melting point      | 109 - 111 °C                                                                                                                   |
| CAS number         | 108-46-3                                                                                                                       |

- |                                |          |
|--------------------------------|----------|
| 1. Resorcinol .....            | 15 g     |
| 2. Purified water .....        | 15 g     |
| 3. Sodium metabisulphite ..... | 0,1g     |
| 4. Lanette cream .....         | csp100 g |

Lanette cream composition: Cetostearyl alcohol, decyloleate, sorbitol, sorbic acid and purified water.

Supplementary table 1: Physicochemical properties of resorcinol and topical 15% resorcinol formulation
